# Supplementary material
Source: PubMed Central journal article supplement (PMC7825950)
Supplement: mmc1.pdf [file mmc1.pdf]

# THE LANCET

## **Supplementary appendix**

This appendix formed part of the original submission. We post it as supplied by the authors.

Supplement to: Priesemann V, Balling R, Brinkmann MM, et al. An action plan for pan-European defence against new SARS-CoV-2 variants. *Lancet* 2021; published online Jan 21. [http://dx.doi.org/10.1016/S0140-6736\(21\)00150-1](http://dx.doi.org/10.1016/S0140-6736(21)00150-1).

***Please find the list of signatories, translations and further information on our website:***  
[www.containcovid.eu](http://www.containcovid.eu)

## Supplementary Material (SI)

In the following, taking an epidemiological perspective, we focus on the core principles that can slow down the spread of the virus, and note that the aforementioned strain on public health and personal well-being needs to be taken into account as well. To reduce the strain on health, society and economy, the necessary duration of strict measures should be as short as possible - which should be achieved by making them as strong and effective as possible.

It is worth stressing that our conclusions are not limited to B.1.1.7 or other variants identified to date: they apply in general whenever the emergence of new mutations challenges existing practices and strategies. Improved surveillance is necessary to detect them as early as possible, and to allow countries to prepare. In addition, experimental data to understand altered biological characteristics will always lag weeks to months behind the first identification of a new variant by genetic sequencing. Thus, wide-ranging decisions always have to be taken at a time of high uncertainty, and certainly while evidence of the real impact of new variants is still emerging. But only then proactive measures can still be effective for containment or at least deceleration of spread. The following points provide a guideline, complementary to previous ones<sup>1,8</sup>.

### Achieve and maintain low case numbers with a clear prevention strategy

**Define clear targets and rekindle motivation** The motivation and ability of many people to comply with restrictions is waning ("pandemic fatigue"), rendering any NPIs (non-pharmaceutical interventions) less effective. Imposing ever stricter measures puts an increasing strain on societies and economies. Therefore, governments need to strengthen public spirits by ensuring that measures are fair and consistent. This includes clearly explaining the rationales and evidence underlying these measures, and making the base for their decision-making transparent. They need to convincingly convey that the fight against the pandemic needs a collective effort that is in the interest of every citizen, and to ensure that adequate social and economic support is available for those who struggle. An important element of this strategy is to set and communicate common targets that will end the lockdown when met, instead of setting specific dates (that are then revised and extended, which compromises public morale further). People need to be re-empowered in the sense that it is in their own hands and in their own interest to comply with public health measures.

**Act early.** Implement mitigation measures before case numbers spike. A preventive implementation of mitigation measures can slow down the expected increase of case numbers or even reduce current case numbers, thus alleviating the burden on the healthcare system. Especially given the interval of at least 7 days between infection and reporting of a novel case, reporting is always delayed, and mitigation measures, if taken only after case numbers start to rise, may already have reduced effectiveness. Acting promptly is therefore crucial to save lives.

**Reduce the number of physical contacts.** Physical contacts in all contexts bear the risk of contagions, and as the secondary attack rate of B.1.1.7 is probably 14% instead of 10% in the UK<sup>6,7</sup>, reducing contacts is even more important to slow the spread and reduce the number of new cases. This applies to all contacts at family and social gatherings, at work, at school, or in public places. The principle for everyone should thus be to meet as few different people as possible. Home-office and online schooling should be implemented whenever and wherever possible. Support for home-schooling parents should be scaled up. Group sizes should be reduced, and group members should remain the same. In all circumstances of private and

professional settings, small, stable social bubbles or groups should be preferred over alternating contacts.

Public transport is ideally run with at most a fraction of seats occupied, as long as case numbers are high. The use of public transport is reduced by home-office arrangements, closing schools, and stay-at-home orders. While the risk of contagion in each type of public transport is very hard to infer, the setting - many people in a closed, crowded space - clearly bears the risk for contagion. Therefore, to protect those who cannot work from home and have to rely on public transport, public transport at peak hours should be used only by those who strongly need it and the number of vehicles should be increased. Moreover, starting times of work, retail and schools should be staggered.

**Prevent contagion by the continuation of individual measures.** By now, the transmission paths of SARS-CoV-2 are much better understood. We know that a key risk lies in ballistic drops and aerosols, with the latter accumulating suspended in air shared with an infectious individual. Therefore, the advantages and the principles of transmission prevention should be clearly communicated in easy language. Effective prevention measures are by now well known; they include physical distancing, hygiene, wearing of face masks, ventilation and use of filters, avoiding closed and crowded spaces and staying at home when experiencing symptoms. Meeting outside instead of inside can reduce the risk of contagion by a factor up to 20<sup>th</sup>. The more effective FFP2 masks should be provided at no cost to those in need, and for all employees at work.

## Monitor the spreading of the virus and of individual variants

**Test, trace, isolate, support (TTIS).** Detecting and breaking infection chains strongly contributes to mitigation of the spread. Here, individuals can support the health authorities, e.g. by noting down their contacts on a regular basis. Complementarily, tracing apps prove useful. Both facilitate a swift identification and quarantine of potentially infected contacts. Moreover, the knowledge gained from contact tracing improves our understanding of which contacts bear a greater risk of contagion. The necessary isolation and preventive quarantine should be clearly encouraged, enforced, and individuals should be supported. It is crucial to report case numbers and data on hospitalization and deaths, including complementary information on local and national level, and ensure they are openly published and machine readable for scientific evaluation.

**Screen and test preventively.** Given the circulation of new variants, wherever people have to meet in person, prior testing and regular screening is of even greater importance than has been the case previously. Access to tests should be facilitated, and the testing capacity has to be increased to meet the demand. At the workplace, employers should offer regular testing at no cost to their employees, ideally twice a week. Complementarily, regular, and potentially anonymous screening is helpful and important to detect outbreaks early at workplaces, schools, universities, and elsewhere. Moreover, waste-water surveillance to detect local surges and general screening is easy, anonymous, and cost efficient to implement.

Long-term lockdowns, or expansive quarantine rules, due to the burdens they impose on those affected, become increasingly ineffective and invite people to circumvent them. Therefore, with the increasing availability, accessibility and decreasing cost of rapid antigen tests, and with the first certified at-home tests becoming available, participation in non-essential activities (ranging from cultural and sports activities over restaurant visits to body-related services) should be made dependent on a negative test result not older than 24h. It is important to ensure easy access for all citizens to tests, in particular to employees at work, and that there are no other formal or informal barriers to test-taking. Policy makers should also ensure that sufficient production capacity is made available for the subsequent increased demand in tests.

**Increase sequencing and PCR-based detection of the B.1.1.7 variant.** Improved surveillance allows a better prediction of case numbers and mutants. It is important to not only report case numbers but also to increase sequencing and PCR-based detection of the B.1.1.7 variant, as well as other variants of SARS-CoV-2<sup>o</sup>.

## Stop virus at borders and protect the vulnerable

**Reduce all travel within and across countries.** Reduction of domestic and transnational travel can slow down the overall increase. Restricting mobility within a country and transnationally helps to slow down the spread of the new variant and isolate possible outbreaks of the new variant before they spread to other areas or countries. This (a) leads to a slower average increase of case numbers in the entire country, (b) reduces the number of regions requiring stricter containment measures, and (c) enables hospitals from less affected regions to support others.

**Require tests and quarantine for cross-border travelers.** Preventive testing and quarantine for transnational travelers slows down the transborder spread of new variants. Therefore, two tests (at most 24 hours before travel, and 7-10 days after travel) should be required for anyone arriving from countries with local COVID-19 transmission. In addition, a strict quarantine of at least 10 days should be ordered for anyone arriving from countries with high prevalence or novel suspicious variants.

**Improve the protection of, and support for, the elderly and vulnerable groups.** The best protective measure is to bring case numbers down. At high case numbers the number of undetected infections increases, and the virus is inadvertently brought to the vulnerable population<sup>8</sup>. At high case numbers, an efficient protection of the vulnerable population has not been achieved yet. In any case, protection and support plans for the vulnerable, incorporating and extending the points above, need to be improved. Here, European exchange about successful strategies and measures will speed up the progress.

## Increase the efficacy and pace of the vaccination

**Speed up vaccination.** B.1.1.7 has increased the need to speed up vaccination. In order to improve vaccine supply, delivery and allocation in terms of priority groups, international cooperation is urgently needed to be able to learn from each other and to implement the most effective strategies in terms of European public health and global public health security. Decision-making becomes more effective when uncertainty is reduced by combining different sources of data and data from many countries. Moreover, governments should coordinate their efforts in scaling up the production of the vaccines taking into consideration supply chains and the need to increase capacity.

**Monitor infections among vaccinated people.** Vaccination is a weapon also against the current new virus variants. Initial analyses indicate that the mutations found in the novel variant do not decrease the potency of the vaccines<sup>9</sup>. However, mutations may arise against which the vaccines are less effective. This requires monitoring of infections among vaccinated people.

**Answer urgent questions through international collaboration.** Many questions need answering quickly: Can we improve vaccination regimes, e.g. administer only one dose to people that have already been infected as a booster to better manage scarce resources? Would that compromise the ability to identify escape mutants? How can logistics be improved? What parameters ought to be considered in terms of allocation for effective vaccine delivery in remote and inaccessible regions? How can people best be motivated to take the vaccine and what are the best strategies to overcome vaccine hesitancy and vaccine refusal?

## Additional References

[11] Bulfone, T. C., Malekinejad, M., Rutherford, G. W., & Razani, N. [Outdoor Transmission of SARS-CoV-2 and Other Respiratory Viruses, a Systematic Review](#). *The Journal of infectious diseases*, 2020.

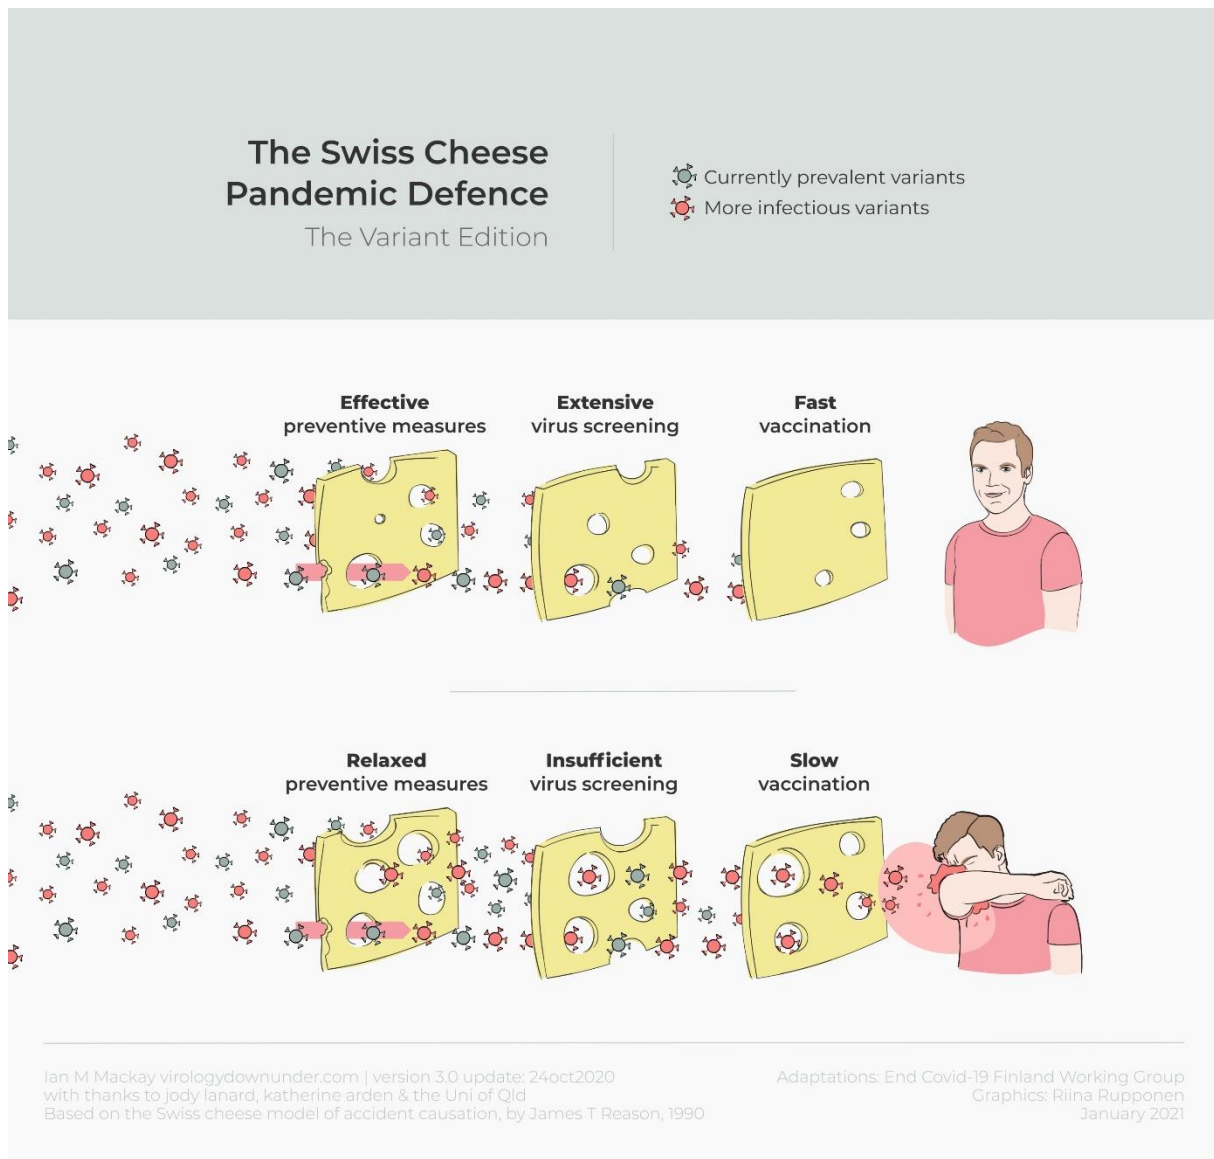

This work by Riina Rupponen is licenced under [CC BY 4.0](#).

The crucial role of efficient prevention measures, virus screening and vaccination in protecting the society from SARS-CoV-2, especially from more infectious variants, which spread faster. With efficient prevention measures aiming at achieving and maintaining low case numbers, with clear prevention strategy (top row, cheese slice 1), as well as with the addition of efficient virus screening (top row, cheese slice 2) and fast vaccination (top row, cheese slice 3), the emergence of the new virus variant does not overwhelm the pandemic control and the society is protected. With inefficient prevention measures, as well as not wide enough virus screening and variant detection, and finally with slow vaccination, the pandemic control is overwhelmed by the more infectious variant and the society is not protected.

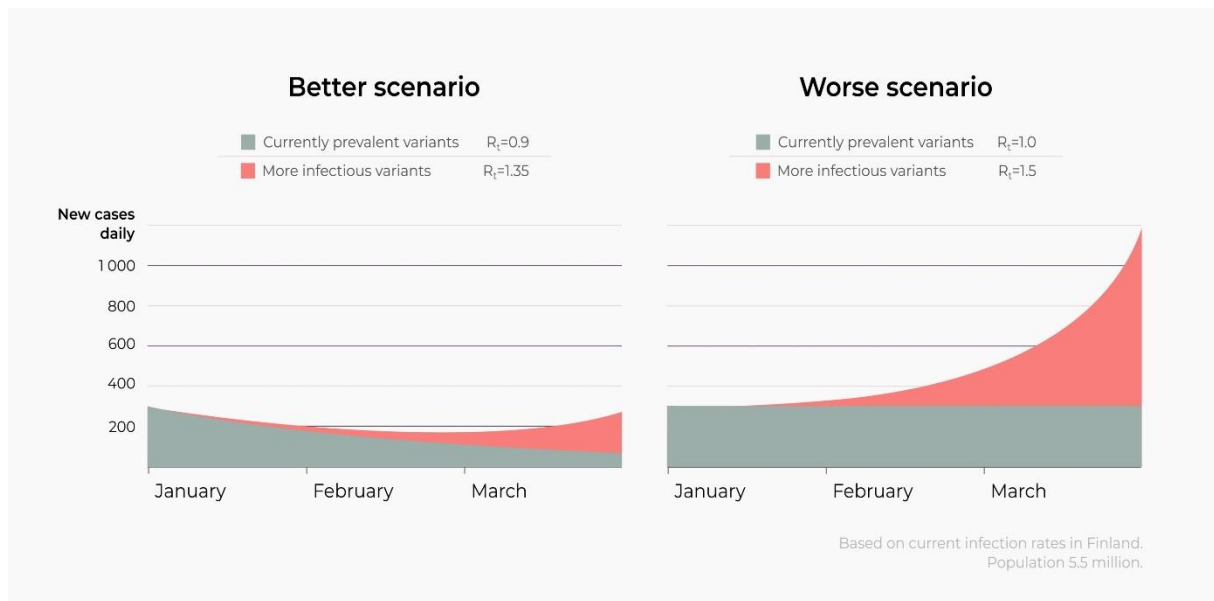

This work by Riina Rupponen is licenced under [CC BY 4.0](https://creativecommons.org/licenses/by/4.0/).

**Scenario 1** Measures aim at slow suppression having  $R_{eff} = 0.9$  with old SARS-CoV-2 virus variants. However, new virus variants with higher transmissibility increase the  $R_{eff}$  turning a suppressed epidemic to a growing epidemic.

**Scenario 2** Measures are slightly easier than in scenario 1 resulting in  $R_t = 1.0$  with old variants. Epidemic is not growing or decreasing. However, with new variants epidemic start exponential growth which can lead to serious crisis of a society.
